# Supplementary material for: Preferential Binding of Polyphenols in Blackcurrant Extracts with Milk Proteins and the Effects on the Bioaccessibility and Antioxidant Activity of Polyphenols
Source: MDPI journal article supplement (doi:10.3390/foods13040515), 2024-02-07
Supplement: s1 [file s1]

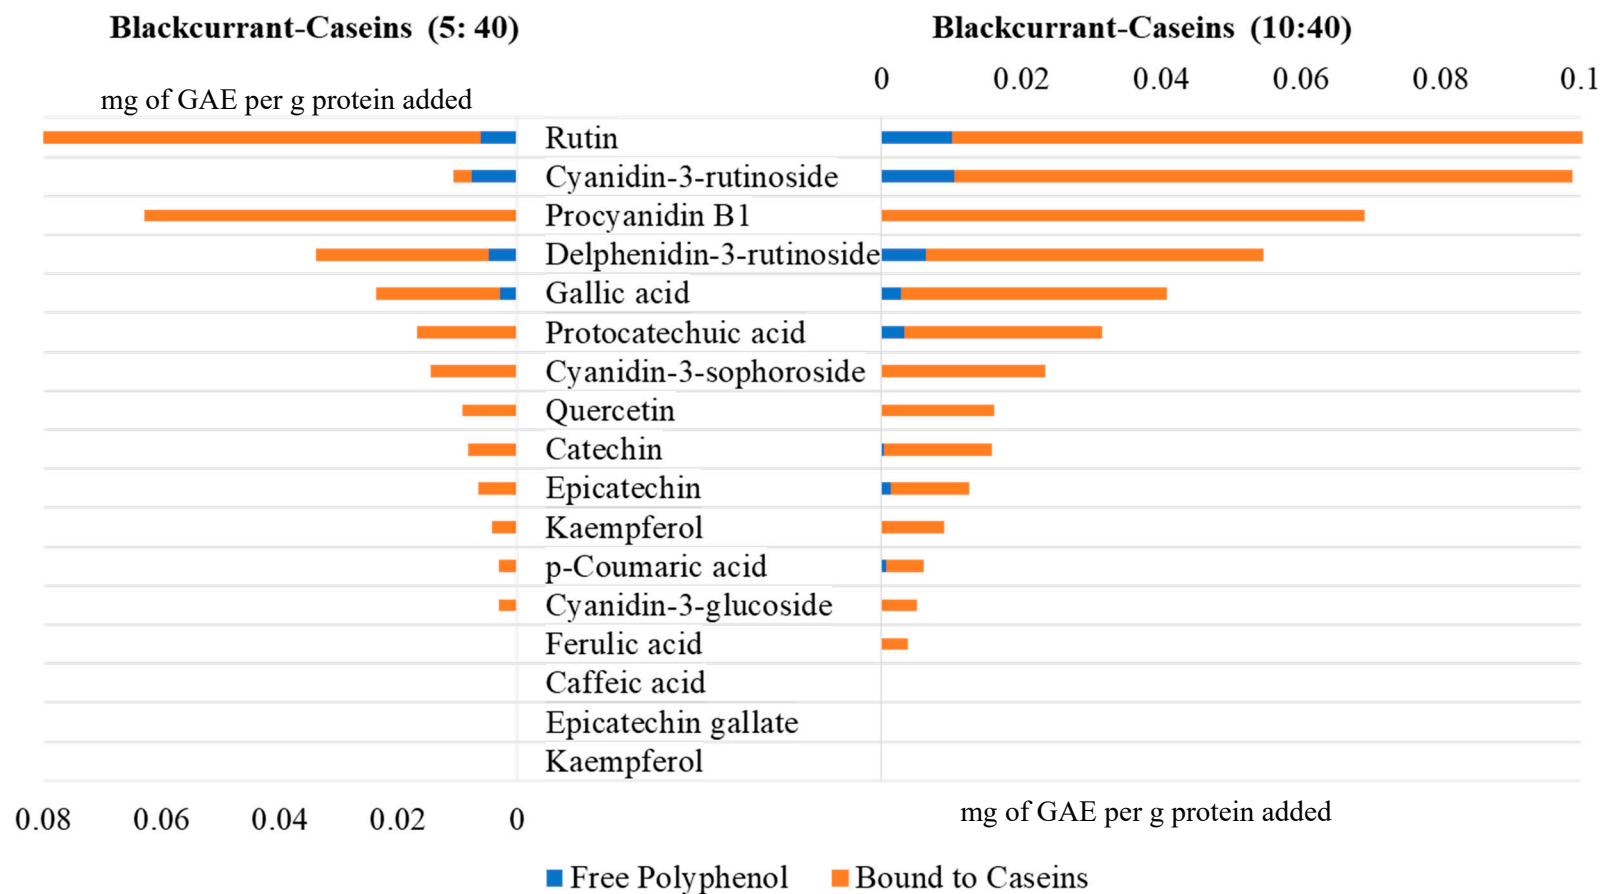

Supplementary Figure S1. Free and bound polyphenol content (expressed as mg of gallic acid equivalent (GAE) per g protein added) in casein-based blackcurrant samples with a ratio of polyphenol to caseins of 5:40 and 10:40.

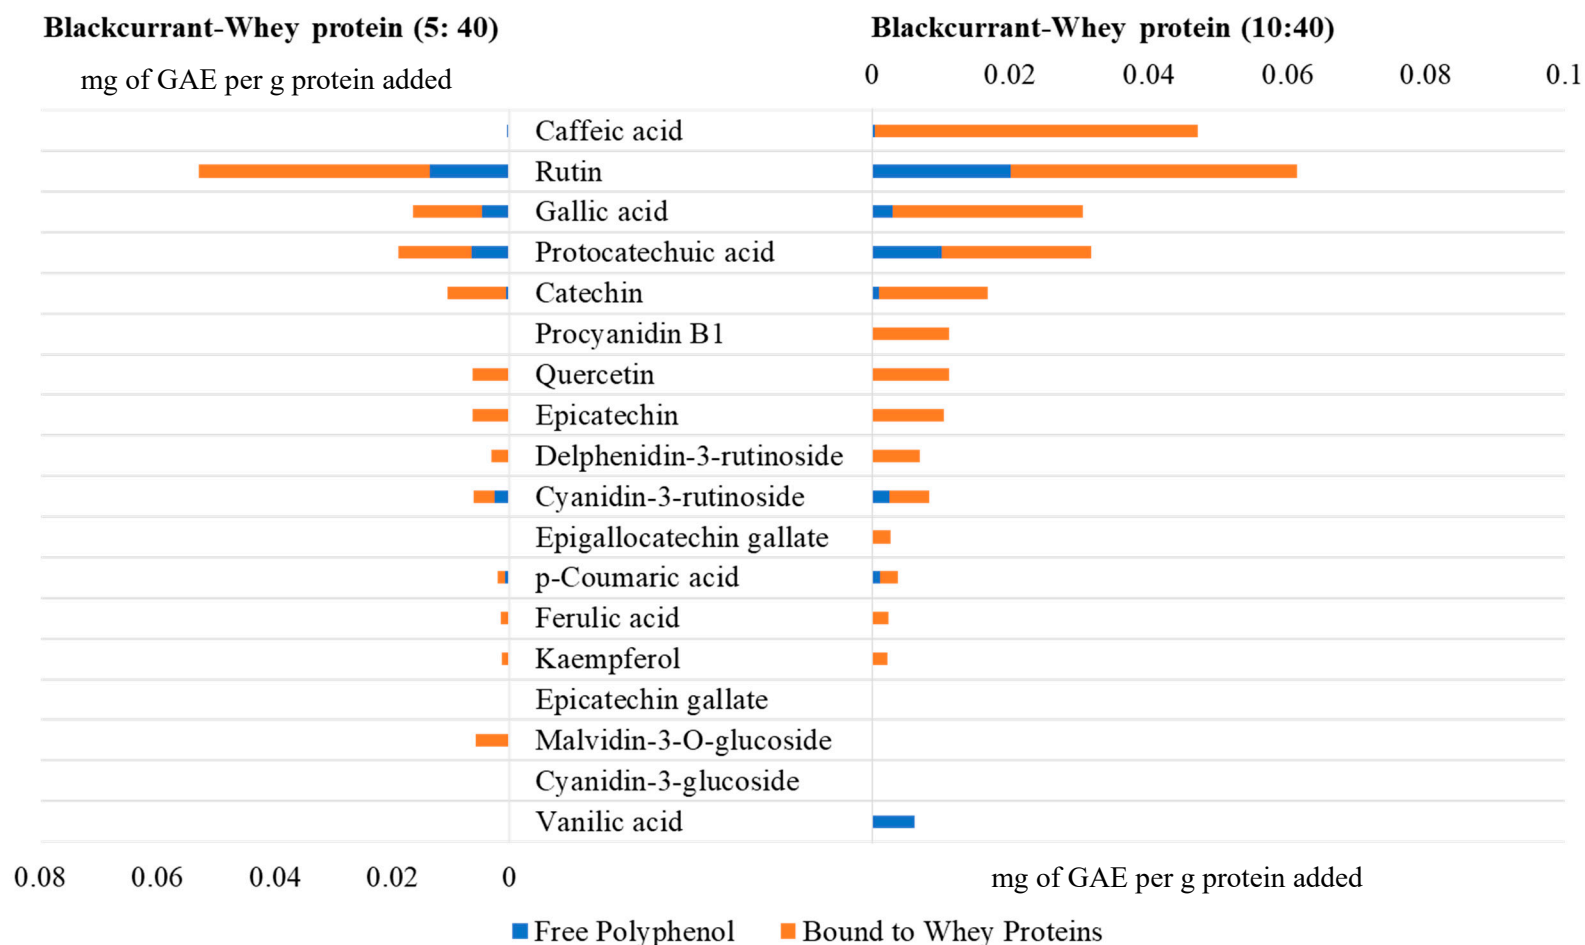

Supplementary Figure S2. Free and bound polyphenol content (expressed as mg of gallic acid equivalent (GAE) per g protein added) in whey protein-based blackcurrant samples with a ratio of polyphenol to whey protein of 5:40 and 10:40.
